# Supplementary material for: Poly(vinyl alcohol)–Gantrez® AN cryogels for wound care applications
Source: Royal Society of Chemistry journal article supplement (doi:10.1039/c6ra24573k), 2016-01-01
Supplement: c6ra24573k1.pdf [file c6ra24573k1.pdf]

### Poly(vinyl alcohol)- Gantrez<sup>®</sup> AN cryogels for wound care applications

Enrica Caló,<sup>a</sup> Joao M.S. de Barros,<sup>a</sup> Lucy Ballamy,<sup>b</sup> Vitaliy V. Khutoryanskiy<sup>a</sup>

<sup>a</sup>Reading School of Pharmacy, University of Reading, Reading, Berkshire, RG6 6AD, United Kingdom

<sup>b</sup>ConvaTec UK Ltd, First Avenue-Deeside Industrial Park, Flintshire CH5 2NU, Wales, United Kingdom.

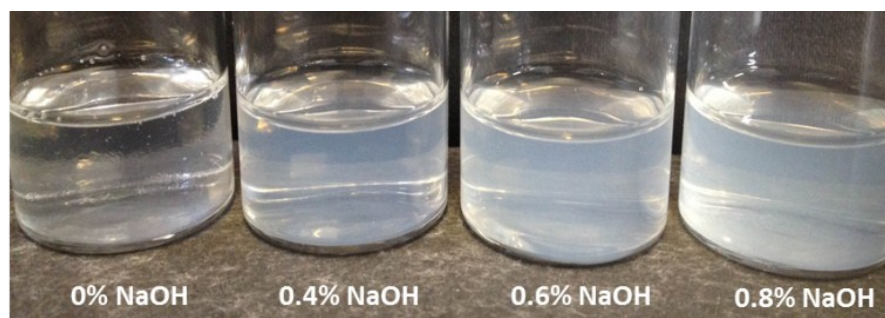

**Figure S1.** PVA-Gantrez<sup>®</sup> liquid mixture with no NaOH added and PVA-Gantrez<sup>®</sup>AN plus NaOH (0.4, 0.6 and 0.8%w/v) mixtures before freezing.

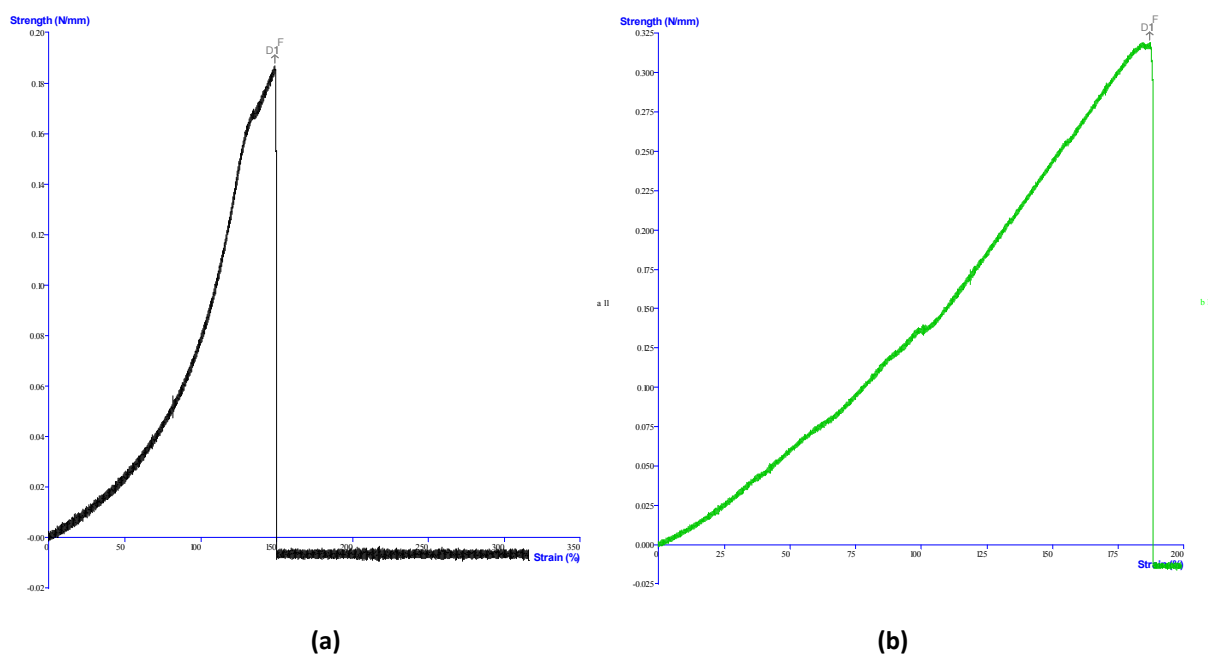

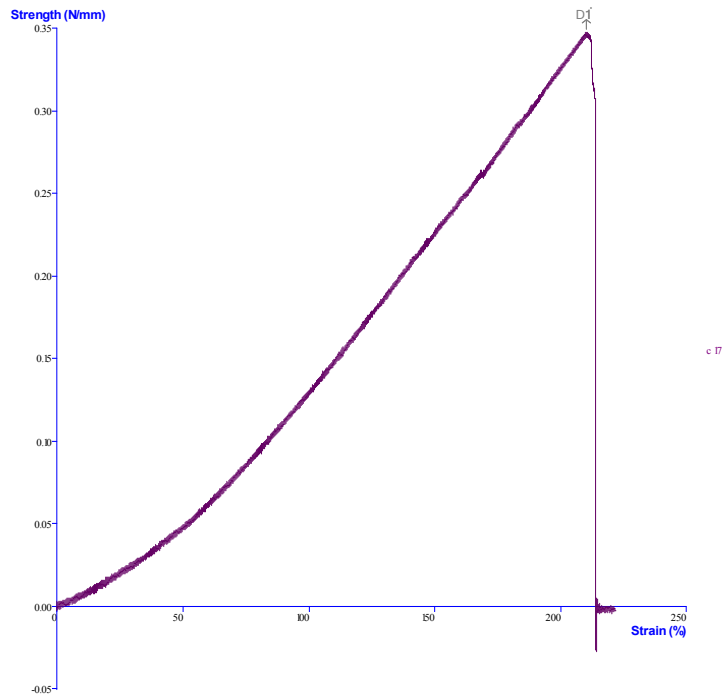

(c)

**Figure S2.** Exemplary tensile test raw data for PVA-Gantrez® cryogels prepared with addition of 0.4 % (a), 0.6 % (b), 0.8 % NaOH (c).

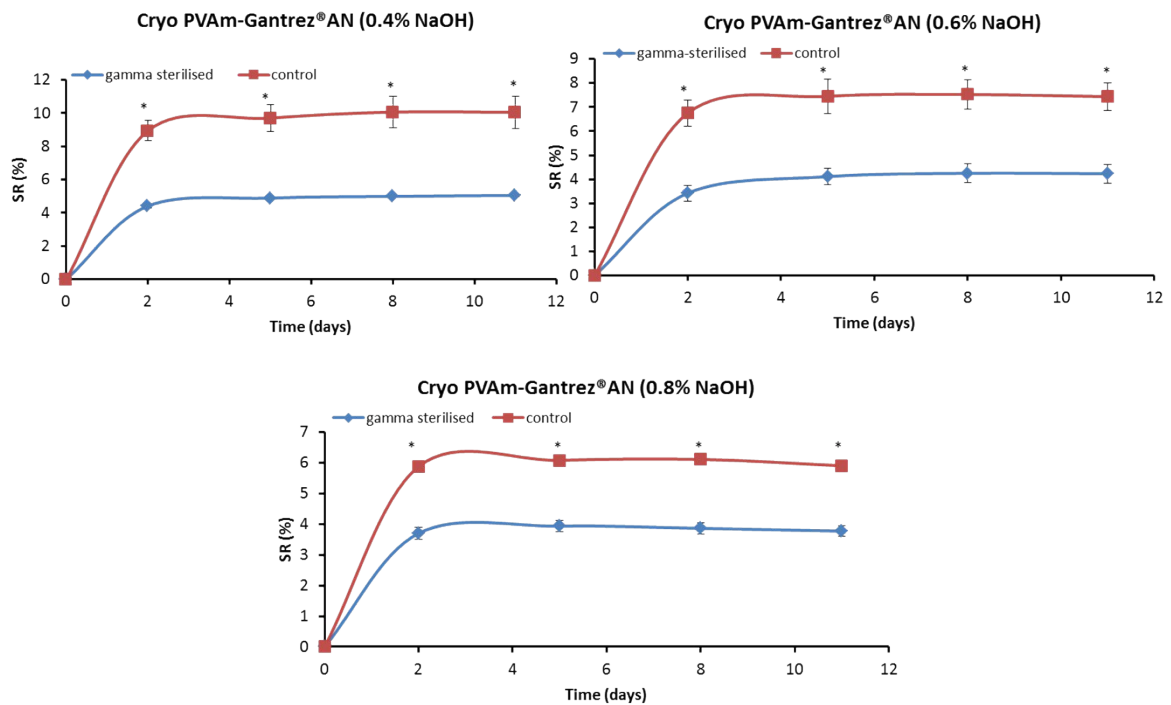

**Figure S3.** Swelling kinetics in deionised water for gamma-sterilised PVA-Gantrez®AN cryogels during a period of 11 days. Non-irradiated samples are used as control. Asterisk (\*) indicates significant statistical difference ( $p < 0.05$ ). Please note the test was performed on non-freshly prepared samples due to the irradiation process being conducted by Synergy Health plc. not in the house.

**Table S1.** Mechanical properties of gamma-irradiated and non-gamma irradiated PVA-Gantrez®AN cryogels. Please note the test was performed on non-freshly prepared samples due to the irradiation process being conducted by Synergy Health plc. not in the house.

| <b><math>\gamma</math>-irradiated cryogels</b> | <b>Tensile stress at break (N/mm<sup>2</sup>)</b> | <b>Maximum strength (N/mm)</b> | <b>Elongation to Break (%)</b> | <b>Young's Modulus (N/mm<sup>2</sup>)</b> |
|------------------------------------------------|---------------------------------------------------|--------------------------------|--------------------------------|-------------------------------------------|
| 0.4% NaOH                                      | $(6.0 \pm 4.4) \times 10^{-5}$                    | $0.19 \pm 0.1$                 | $36 \pm 4$                     | $(1.0 \pm 0.2) \times 10^{-2}$            |
| 0.6% NaOH                                      | $(8.4 \pm 6.5) \times 10^{-4}$                    | $(8.0 \pm 0.3) \times 10^{-2}$ | $43.2 \pm 2.2$                 | $(7.3 \pm 2.3) \times 10^{-3}$            |
| 0.8% NaOH                                      | $(2.5 \pm 0.8) \times 10^{-5}$                    | $(5.7 \pm 4.3) \times 10^{-2}$ | $46.1 \pm 1.7$                 | $(7.6 \pm 3.2) \times 10^{-3}$            |

| <b>Non- irradiated cryogels</b> | <b>Tensile stress at break (N/mm<sup>2</sup>)</b> | <b>Maximum strength (N/mm)</b> | <b>Elongation to Break (%)</b> | <b>Young's Modulus (N/mm<sup>2</sup>)</b> |
|---------------------------------|---------------------------------------------------|--------------------------------|--------------------------------|-------------------------------------------|
| 0.4% NaOH                       | $(2.1 \pm 1.6) \times 10^{-5}$                    | $0.2 \pm 0$                    | $78.2 \pm 7.5$                 | $(4.3 \pm 1.2) \times 10^{-3}$            |
| 0.6% NaOH                       | $(5.5 \pm 1.7) \times 10^{-5}$                    | $0.1 \pm 4 \times 10^{-2}$     | $78.0 \pm 3.6$                 | $(5.6 \pm 1.2) \times 10^{-3}$            |
| 0.8% NaOH                       | $(3.9 \pm 1.7) \times 10^{-5}$                    | $(9.6 \pm 4.7) \times 10^{-2}$ | $72.3 \pm 10.1$                | $(9.6 \pm 3.7) \times 10^{-3}$            |
